# Supplementary material for: Hydrogen storage in M(BDC)(TED)0.5 metal–organic framework: physical insights and capacities
Source: Royal Society of Chemistry journal article supplement (doi:10.1039/d4ra02697g), 2024-01-01
Supplement: d4ra02697g1.pdf [file d4ra02697g1.pdf]

## Electronic Supplementary Information

### Hydrogen storage in M(BDC)(TED)<sub>0.5</sub> metal-organic framework: Physical insights and capacities†

Nguyen Thi Xuan Huynh,<sup>\*a</sup> Vu Thi Ngan,<sup>a</sup> Nguyen Thi Yen Ngoc,<sup>bc</sup> Viorel Chihaiia,<sup>d</sup> and Do Ngoc Son<sup>\*bc</sup>

<sup>a</sup> Laboratory of Computational Chemistry and Modelling (LCCM) - Faculty of Natural Sciences, Quy Nhon University, 170 An Duong Vuong, Quy Nhon City, Binh Dinh Province, Vietnam. E-mail: nguyenthixuanhuynh@qnu.edu.vn

<sup>b</sup> Ho Chi Minh City University of Technology (HCMUT), 268 Ly Thuong Kiet Street, District 10, Ho Chi Minh City, Vietnam. E-mail: dnson@hcmut.edu.vn

<sup>c</sup> Vietnam National University Ho Chi Minh City, Linh Trung Ward, Ho Chi Minh City, Vietnam.

<sup>d</sup> Institute of Physical Chemistry "Ilie Murgulescu" of the Romanian Academy, Splaiul Independentei 202, Sector 6, 060021 Bucharest, Romania.

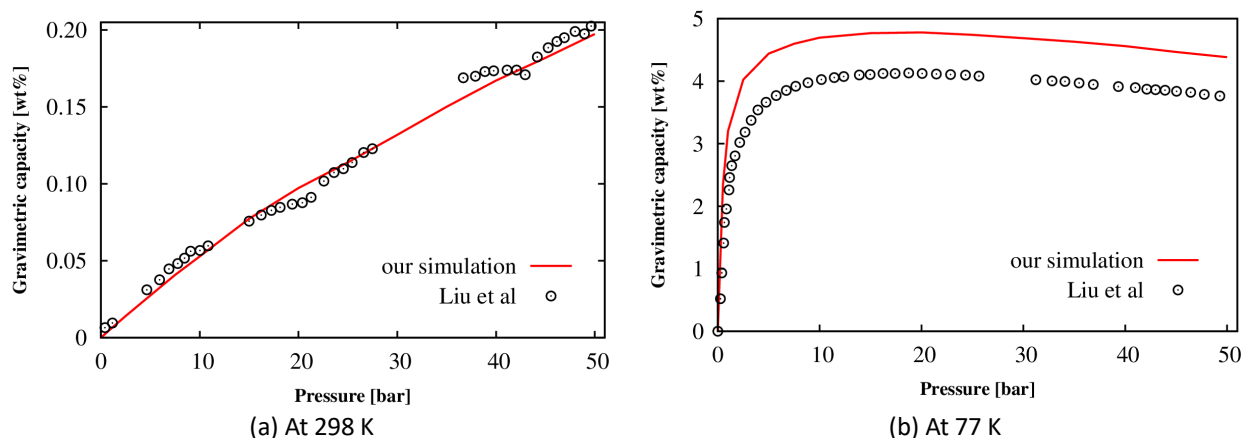

**Fig. S1** The excess H<sub>2</sub> uptake capacities of Zn(BDC)(TED)<sub>0.5</sub> at 298 K (a) and 77 K (b): our simulation and experimental data.<sup>1</sup>

**Table S1** A comparison of gravimetric excess H<sub>2</sub> loadings between our simulation and available experimental data for Zn(BDC)(TED)<sub>0.5</sub><sup>1</sup>

| M-MOF                       | Temperature, Pressure                       | This work (wt%) | Experimental data (wt%) | Errors                |
|-----------------------------|---------------------------------------------|-----------------|-------------------------|-----------------------|
| Zn(BDC)(TED) <sub>0.5</sub> | 298 K, 50 bar                               | 0.197           | ca. 0.202               | ca. 0.005 wt% (2.5 %) |
|                             | 77 K, 50 bar                                | 4.380           | ca. 3.760               | ca. 0.620 wt% (16 %)  |
|                             | 77 K, the pressure at the maximum (~20 bar) | 4.78            | ca. 4.03                | ca. 0.75 wt% (18.6 %) |

1 J. Liu, J. Y. Lee, L. Pan, R. T. Obermyer, S. Simizu, B. Zande, J. Li, S. G. Sankar and J. K. Johnson, J. Phys. Chem. C, 2008, 112, 2911–2917.
